# Supplementary material for: Development and external validation of a prognosis model to predict outcomes after curative resection of early-stage intrahepatic cholangiocarcinoma
Source: PubMed Central journal article supplement (PMC10030709; doi:10.3389/fsurg.2023.1102871), 2023-03-08

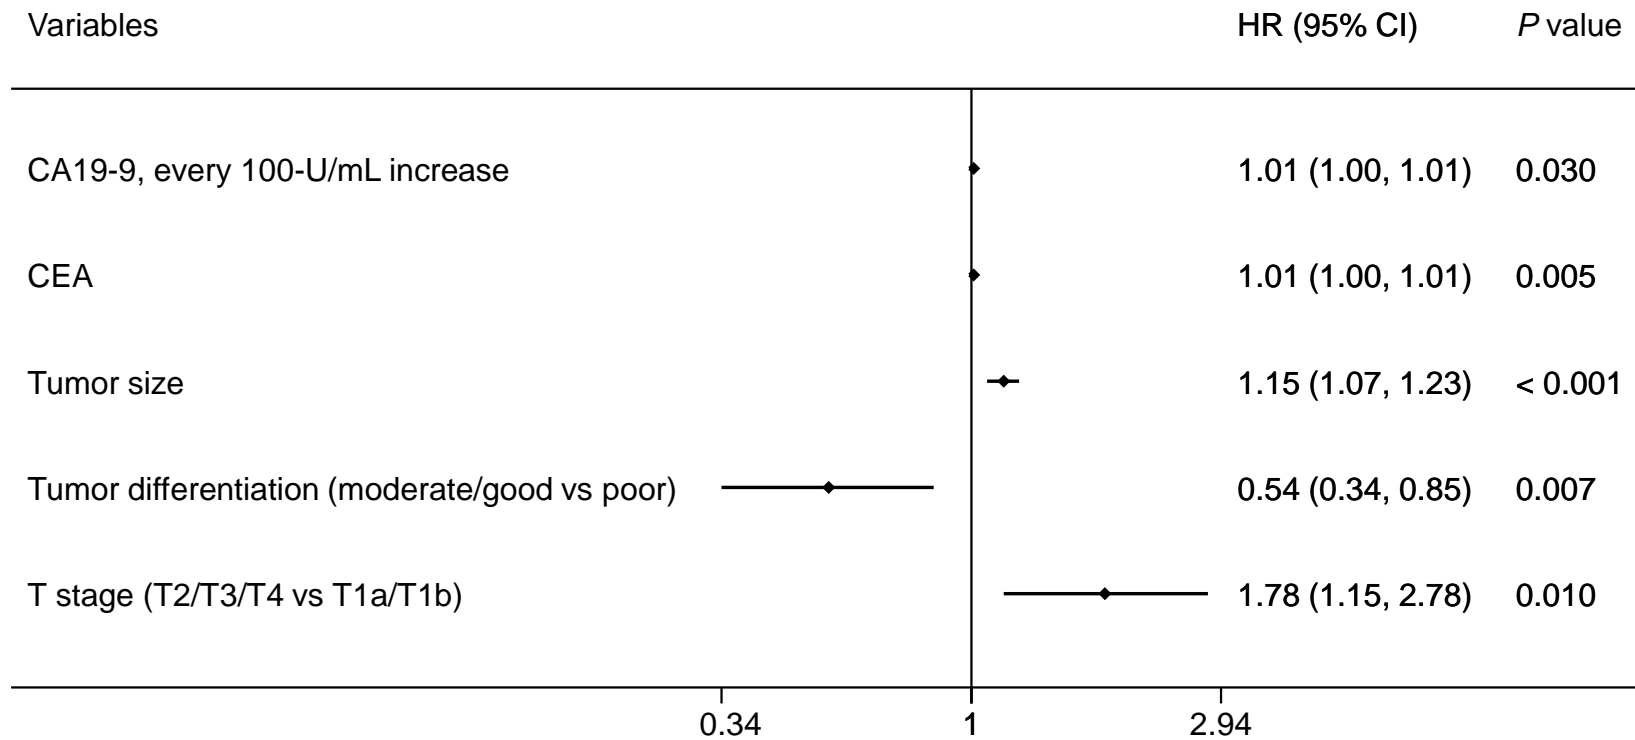

Supplement: Image2.pdf [file Image2.pdf]
